# Supplementary figures and images for: Risk factors for 30-day readmission in adults hospitalized for pulmonary hypertension
Source: PubMed Central journal article supplement — Pulm Circ. 2020 Nov 23;10(4):2045894020966889. doi: 10.1177/2045894020966889 (PMC7686634; doi:10.1177/2045894020966889), 2020-11-23

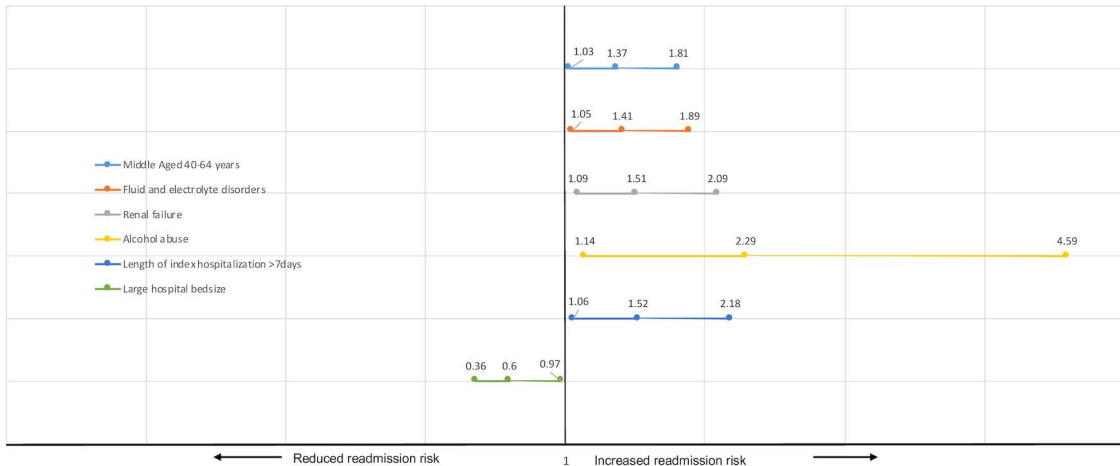

**Supplemental Figure 1 - Risk factors for 30-day readmissions in Primary Pulmonary Hypertension**

Supplement: sj-pdf-1-pul-10.1177_2045894020966889.pdf [file sj-pdf-1-pul-10.1177_2045894020966889.pdf]

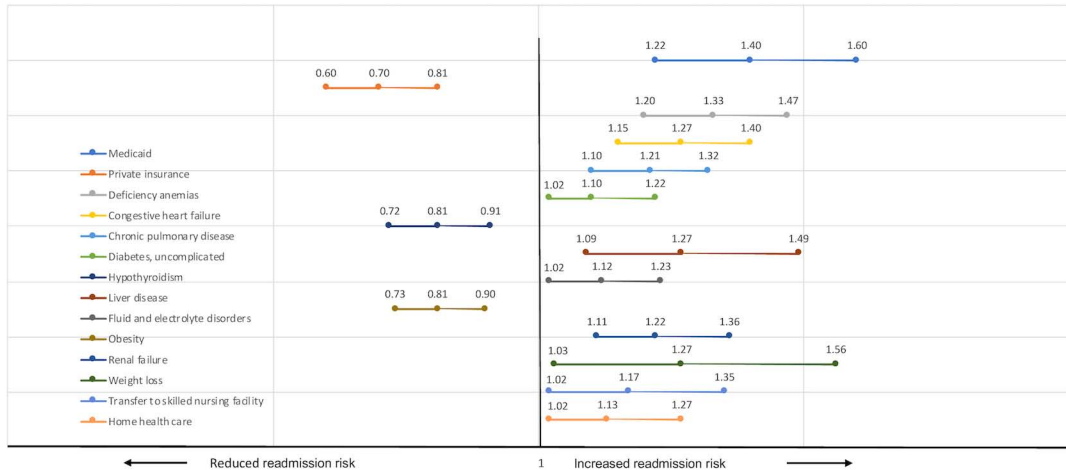

**Supplemental Figure 2 - Risk factors for 30-day readmissions in Secondary Pulmonary Hypertension**

Supplement: sj-pdf-2-pul-10.1177_2045894020966889.pdf [file sj-pdf-2-pul-10.1177_2045894020966889.pdf]
